# Supplementary material for: Neighborhood Social Cohesion and Sleep Health by Age, Sex/Gender, and Race/Ethnicity in the United States
Source: MDPI journal article supplement (doi:10.3390/ijerph17249475), 2020-12-17

**Supplemental Table 1.** Age-standardized Sociodemographic, Health Behavior, and Clinical Characteristics between Low, Medium, and High Neighborhood Social Cohesion Among 18–30, 31–49, and ≥50 years old, National Health Interview Survey, 2013–2018 (N=167,153) <sup>a</sup>.

| Sociodemographic                         | Neighborhood Social Cohesion |                   |                 |                   |                   |                 |                  |                   |                 |
|------------------------------------------|------------------------------|-------------------|-----------------|-------------------|-------------------|-----------------|------------------|-------------------|-----------------|
|                                          | Low                          |                   |                 | Medium            |                   |                 | High             |                   |                 |
|                                          | n=53,364 (32%)               |                   |                 | n=55,163 (33%)    |                   |                 | n=58,626 (35%)   |                   |                 |
|                                          | 18–30<br>n=13,123            | 31–50<br>n=17,036 | ≥50<br>n=23,205 | 18–30<br>n=10,073 | 31–50<br>n=17,003 | ≥50<br>n=28,087 | 18–30<br>n=7,308 | 31–50<br>n=16,130 | ≥50<br>n=35,188 |
| Sex/gender                               |                              |                   |                 |                   |                   |                 |                  |                   |                 |
| Women                                    | 51.2%                        | 52.4%             | 54.1%           | 47.1%             | 49.1%             | 50.4%           | 50.8%            | 51.4%             | 54.1%           |
| Race/ethnicity                           |                              |                   |                 |                   |                   |                 |                  |                   |                 |
| NH-White                                 | 52.6%                        | 51.6%             | 68.0%           | 59.5%             | 60.3%             | 73.5%           | 69.6%            | 71.7%             | 81.0%           |
| NH-Black                                 | 16.4%                        | 15.9%             | 12.8%           | 12.5%             | 12.5%             | 11.1%           | 10.2%            | 7.5%              | 7.5%            |
| Hispanic/Latinx                          | 25.5%                        | 26.2%             | 14.4%           | 21.5%             | 18.8%             | 10.0%           | 14.8%            | 14.1%             | 7.4%            |
| Asian                                    | 5.5%                         | 6.3%              | 4.8%            | 6.5%              | 8.4%              | 5.4%            | 5.3%             | 6.7%              | 4.1%            |
| Educational attainment                   |                              |                   |                 |                   |                   |                 |                  |                   |                 |
| <High school                             | 10.0%                        | 13.3%             | 14.8%           | 8.0%              | 8.7%              | 10.0%           | 7.2%             | 6.8%              | 9.1%            |
| High school graduate                     | 30.0%                        | 27.1%             | 30.6%           | 27.9%             | 22.0%             | 27.8%           | 27.0%            | 20.5%             | 28.2%           |
| Some college                             | 38.8%                        | 29.8%             | 29.1%           | 38.0%             | 27.1%             | 28.5%           | 41.4%            | 27.4%             | 28.1%           |
| ≥College                                 | 21.1%                        | 29.8%             | 25.4%           | 26.1%             | 42.1%             | 33.7%           | 24.4%            | 45.3%             | 34.6%           |
| Annual household income                  |                              |                   |                 |                   |                   |                 |                  |                   |                 |
| <\$35,000                                | 42.4%                        | 31.7%             | 37.6%           | 32.5%             | 20.6%             | 27.1%           | 27.3%            | 14.6%             | 25.3%           |
| \$35–\$74,999                            | 33.6%                        | 32.5%             | 31.5%           | 32.4%             | 28.0%             | 30.3%           | 29.1%            | 24.8%             | 29.2%           |
| ≥\$75,000                                | 24.0%                        | 35.8%             | 30.9%           | 35.1%             | 51.4%             | 42.7%           | 43.6%            | 60.6%             | 45.5%           |
| Unemployed/not in labor force            | 30.4%                        | 23.2%             | 54.8%           | 30.3%             | 18.1%             | 50.7%           | 31.2%            | 18.0%             | 50.8%           |
| Occupational class                       |                              |                   |                 |                   |                   |                 |                  |                   |                 |
| Professional/management                  | 13.6%                        | 19.7%             | 18.0%           | 16.6%             | 26.5%             | 22.9%           | 14.6%            | 28.0%             | 23.5%           |
| Support services                         | 48.6%                        | 43.5%             | 43.0%           | 47.2%             | 42.8%             | 44.3%           | 50.2%            | 44.8%             | 46.5%           |
| Laborers                                 | 37.8%                        | 36.8%             | 39.0%           | 36.1%             | 30.7%             | 32.7%           | 35.1%            | 27.2%             | 30.0%           |
| Marital/co-habiting status               |                              |                   |                 |                   |                   |                 |                  |                   |                 |
| Married/living with partner or cohabited | 36.4%                        | 65.0%             | 57.8%           | 34.7%             | 72.6%             | 65.7%           | 32.8%            | 78.9%             | 69.1%           |
| Divorced/widowed                         | 3.4%                         | 15.4%             | 33.3%           | 2.6%              | 12.5%             | 27.2%           | 3.1%             | 10.3%             | 25.3%           |
| Single/no live-in partner                | 60.2%                        | 19.6%             | 8.9%            | 62.7%             | 15.0%             | 7.1%            | 64.0%            | 10.8%             | 5.5%            |
| Region of residence                      |                              |                   |                 |                   |                   |                 |                  |                   |                 |
| Northeast                                | 15.1%                        | 16.3%             | 19.5%           | 16.8%             | 17.4%             | 20.0%           | 17.0%            | 17.4%             | 18.4%           |



|                                               |       |       |       |       |       |       |       |       |       |
|-----------------------------------------------|-------|-------|-------|-------|-------|-------|-------|-------|-------|
| Recommended BMI (18.5-<25 kg/m <sup>2</sup> ) | 45.5% | 28.0% | 27.4% | 48.8% | 32.1% | 29.3% | 50.0% | 34.0% | 31.8% |
| Overweight (25–29.9 kg/m <sup>2</sup> )       | 28.5% | 35.8% | 36.1% | 29.5% | 36.6% | 38.5% | 28.4% | 35.8% | 38.7% |
| Obese (≥30 kg/m <sup>2</sup> )                | 26.0% | 36.2% | 36.5% | 21.7% | 31.3% | 32.2% | 21.6% | 30.2% | 29.6% |
| Dyslipidemia <sup>e</sup>                     | 12.2% | 39.9% | 64.9% | 12.1% | 36.1% | 61.6% | 12.9% | 37.8% | 62.3% |
| Hypertension <sup>f</sup>                     | 7.3%  | 21.9% | 54.1% | 7.3%  | 18.4% | 49.5% | 6.1%  | 17.9% | 47.0% |
| Prediabetes/diabetes <sup>g</sup>             | 3.6%  | 11.7% | 29.4% | 3.3%  | 9.3%  | 24.1% | 2.2%  | 8.1%  | 21.5% |
| “Ideal” cardiovascular health <sup>h</sup>    | 18.4% | 8.3%  | 3.9%  | 23.4% | 12.1% | 6.0%  | 25.7% | 13.9% | 7.2%  |

<sup>a</sup> Note all estimates are weighted for the survey’s complex sampling design. All estimates are age-standardized to the U.S. 2010 population, except for age. Percentage may not sum to 100 due to missing values or rounding. <sup>b</sup> Insomnia symptoms defined as either trouble falling asleep and/or difficulty maintaining sleep 3+ times a week. <sup>c</sup> Meets PA guidelines defined as ≥150 minutes/week of moderate intensity or ≥75 minutes/week of vigorous intensity or ≥150 minutes/week of moderate and vigorous intensity. <sup>d</sup> Kessler 6-psychological distress scale score ≥13. <sup>e</sup> Dyslipidemia defined as high cholesterol in the 12 months prior to interview. Available for survey years 2011–2017. <sup>f</sup> Hypertension defined as ever told by a doctor had hypertension. <sup>g</sup> Prediabetes/diabetes defined as ever told by a doctor had diabetes or prediabetic condition. <sup>h</sup> “Ideal” cardiovascular health includes never smoking/quit >12 months prior to interview, BMI 18.5 - <25 kg/m<sup>2</sup>, meeting physical activity guidelines, and no prior diagnosis of dyslipidemia, hypertension, or diabetes/prediabetes. .

**Supplemental Table 2.** Age-standardized Sociodemographic, Health Behavior, and Clinical Characteristics between Low, Medium, and High Neighborhood Social Cohesion Among Women and Men, National Health Interview Survey, 2013–2018 (N=167,153) <sup>a</sup>.

|                                           | Neighborhood Social Cohesion |                         |                           |                         |                           |                         |
|-------------------------------------------|------------------------------|-------------------------|---------------------------|-------------------------|---------------------------|-------------------------|
|                                           | Low                          |                         | Medium                    |                         | High                      |                         |
|                                           | <i>n</i> =53,364 (32%)       |                         | <i>n</i> =55,163 (33%)    |                         | <i>n</i> =58,626 (35%)    |                         |
| <b>Sociodemographic</b>                   | Women<br><i>n</i> =29,867    | Men<br><i>n</i> =23,497 | Women<br><i>n</i> =29,031 | Men<br><i>n</i> =26,132 | Women<br><i>n</i> =32,790 | Men<br><i>n</i> =25,836 |
| Age, mean (S.E.)                          | 44.5 (0.17)                  | 43.4 (0.17)             | 47.8 (0.16)               | 46.5 (0.17)             | 51.4 (0.17)               | 49.9 (0.17)             |
| 18–30 years                               | 18.4%                        | 18.9%                   | 15.8%                     | 16.5%                   | 13.6%                     | 13.8%                   |
| 31–50 years                               | 21.2%                        | 20.8%                   | 23.9%                     | 23.1%                   | 26.1%                     | 25.8%                   |
| ≥50 years                                 | 60.3%                        | 60.3%                   | 60.3%                     | 60.3%                   | 60.3%                     | 60.3%                   |
| Race/ethnicity                            |                              |                         |                           |                         |                           |                         |
| NH-White                                  | 60.4%                        | 63.2%                   | 67.7%                     | 68.5%                   | 76.9%                     | 77.1%                   |
| NH-Black                                  | 15.3%                        | 12.8%                   | 12.5%                     | 10.9%                   | 7.9%                      | 7.9%                    |
| Hispanic/Latinx                           | 18.8%                        | 19.1%                   | 13.3%                     | 14.5%                   | 10.0%                     | 10.3%                   |
| Asian                                     | 5.5%                         | 4.9%                    | 6.4%                      | 6.1%                    | 5.3%                      | 4.7%                    |
| Educational attainment                    |                              |                         |                           |                         |                           |                         |
| <High school                              | 13.8%                        | 13.4%                   | 9.2%                      | 9.6%                    | 7.7%                      | 8.9%                    |
| High school graduate                      | 29.2%                        | 30.3%                   | 25.8%                     | 27.0%                   | 25.0%                     | 27.0%                   |
| Some college                              | 32.1%                        | 30.0%                   | 30.7%                     | 28.7%                   | 31.1%                     | 28.2%                   |
| ≥College                                  | 24.9%                        | 26.3%                   | 34.3%                     | 34.7%                   | 36.3%                     | 35.9%                   |
| Annual household income                   |                              |                         |                           |                         |                           |                         |
| <\$35,000                                 | 40.3%                        | 33.8%                   | 28.6%                     | 24.2%                   | 25.0%                     | 20.2%                   |
| \$35–\$74,999                             | 31.7%                        | 32.5%                   | 30.3%                     | 29.9%                   | 27.4%                     | 28.7%                   |
| ≥\$75,000                                 | 27.9%                        | 33.7%                   | 41.2%                     | 45.9%                   | 47.6%                     | 51.0%                   |
| Unemployed/not in labor force             | 47.9%                        | 38.8%                   | 44.7%                     | 35.0%                   | 44.6%                     | 34.1%                   |
| Occupational class                        |                              |                         |                           |                         |                           |                         |
| Professional/management                   | 14.8%                        | 20.8%                   | 18.4%                     | 27.1%                   | 18.9%                     | 28.8%                   |
| Support services                          | 60.3%                        | 26.3%                   | 63.1%                     | 26.6%                   | 64.3%                     | 26.9%                   |
| Laborers                                  | 24.9%                        | 52.9%                   | 18.5%                     | 46.3%                   | 16.8%                     | 44.3%                   |
| Marital/co-habiting status                |                              |                         |                           |                         |                           |                         |
| Married/living with partner or co habited | 51.7%                        | 59.8%                   | 58.9%                     | 66.0%                   | 64.0%                     | 70.1%                   |
| Divorced/widowed                          | 28.9%                        | 18.0%                   | 24.2%                     | 15.1%                   | 22.4%                     | 13.5%                   |
| Single/no live-in partner                 | 19.4%                        | 22.2%                   | 16.9%                     | 18.9%                   | 13.5%                     | 16.4%                   |

|                                         |              |            |               |            |              |            |
|-----------------------------------------|--------------|------------|---------------|------------|--------------|------------|
| Region of residence                     |              |            |               |            |              |            |
| Northeast                               | 18.2%        | 17.8%      | 19.1%         | 18.7%      | 18.3%        | 17.6%      |
| Midwest                                 | 21.2%        | 21.1%      | 22.5%         | 22.7%      | 23.0%        | 24.5%      |
| South                                   | 37.0%        | 35.6%      | 36.1%         | 35.2%      | 38.1%        | 37.6%      |
| West                                    | 23.6%        | 25.6%      | 22.3%         | 23.5%      | 20.5%        | 20.4%      |
| <b>Health Behaviors</b>                 | <b>Low</b>   |            | <b>Medium</b> |            | <b>High</b>  |            |
|                                         | <b>Women</b> | <b>Men</b> | <b>Women</b>  | <b>Men</b> | <b>Women</b> | <b>Men</b> |
| Sleep duration                          |              |            |               |            |              |            |
| <6 hours (very short)                   | 13.1%        | 10.4%      | 7.8%          | 7.9%       | 7.7%         | 7.3%       |
| 6–7 hours (short)                       | 24.5%        | 24.3%      | 22.6%         | 22.6%      | 19.8%        | 21.0%      |
| 7–9 hours (recommended)                 | 57.6%        | 61.2%      | 66.0%         | 65.8%      | 68.5%        | 67.9%      |
| >9 hours (long)                         | 4.8%         | 4.1%       | 3.6%          | 3.6%       | 3.9%         | 3.9%       |
| Trouble falling asleep (≥3 times/week)  | 29.9%        | 20.2%      | 22.2%         | 14.9%      | 20.0%        | 12.8%      |
| Trouble staying asleep (≥3 times/week)  | 36.2%        | 27.8%      | 29.7%         | 23.0%      | 27.7%        | 20.7%      |
| Insomnia symptoms <sup>b</sup>          | 43.7%        | 33.8%      | 36.1%         | 27.3%      | 33.5%        | 24.6%      |
| Woke up feeling unrested (≥3 days/week) | 54.5%        | 46.1%      | 45.4%         | 39.0%      | 40.5%        | 33.0%      |
| Sleep medication (≥3 times/week)        | 13.7%        | 9.0%       | 10.6%         | 7.3%       | 11.2%        | 6.9%       |
| Smoking status                          |              |            |               |            |              |            |
| Never/quit >12 months prior             | 82.7%        | 77.8%      | 86.4%         | 83.1%      | 87.4%        | 83.7%      |
| Quit ≤12 months                         | 1.4%         | 1.6%       | 1.1%          | 1.5%       | 1.0%         | 1.4%       |
| Current                                 | 15.9%        | 20.6%      | 12.5%         | 15.3%      | 11.5%        | 15.0%      |
| Alcohol status                          |              |            |               |            |              |            |
| Never                                   | 26.0%        | 13.7%      | 23.5%         | 13.6%      | 23.7%        | 14.2%      |
| Former                                  | 16.8%        | 18.4%      | 14.1%         | 15.0%      | 13.1%        | 15.1%      |
| Current                                 | 57.2%        | 67.9%      | 62.4%         | 71.3%      | 63.2%        | 70.7%      |
| Leisure-time physical activity          |              |            |               |            |              |            |
| Never/unable                            | 39.6%        | 35.9%      | 32.4%         | 28.5%      | 29.1%        | 27.7%      |
| Does not meet PA guidelines             | 21.1%        | 17.4%      | 21.0%         | 17.3%      | 20.1%        | 16.2%      |
| Meets PA guidelines <sup>c</sup>        | 39.3%        | 46.7%      | 46.6%         | 54.2%      | 50.8%        | 56.1%      |
| <b>Clinical Characteristics</b>         | <b>Low</b>   |            | <b>Medium</b> |            | <b>High</b>  |            |
|                                         | <b>Women</b> | <b>Men</b> | <b>Women</b>  | <b>Men</b> | <b>Women</b> | <b>Men</b> |
| Health status                           |              |            |               |            |              |            |
| Excellent/very good                     | 48.3%        | 51.4%      | 59.1%         | 60.1%      | 65.4%        | 65.3%      |
| Good                                    | 31.2%        | 29.7%      | 28.1%         | 27.1%      | 23.8%        | 24.0%      |
| Fair/poor                               | 20.5%        | 18.9%      | 12.8%         | 12.8%      | 10.8%        | 10.7%      |

|                                               |       |       |       |       |       |       |
|-----------------------------------------------|-------|-------|-------|-------|-------|-------|
| Mental illness <sup>d</sup>                   | 6.8%  | 4.5%  | 3.1%  | 2.1%  | 2.6%  | 1.8%  |
| Body Mass Index (BMI)                         |       |       |       |       |       |       |
| Recommended BMI (18.5–<25 kg/m <sup>2</sup> ) | 34.4% | 27.1% | 39.8% | 26.9% | 42.6% | 26.6% |
| Overweight (25–29.9 kg/m <sup>2</sup> )       | 30.0% | 39.6% | 30.1% | 42.7% | 30.2% | 43.3% |
| Obese (≥30 kg/m <sup>2</sup> )                | 35.7% | 33.3% | 30.1% | 30.4% | 27.2% | 30.2% |
| Dyslipidemia <sup>e</sup>                     | 50.6% | 51.3% | 47.1% | 49.7% | 49.3% | 50.7% |
| Hypertension <sup>f</sup>                     | 37.6% | 39.8% | 33.2% | 37.3% | 31.4% | 36.4% |
| Prediabetes/diabetes <sup>g</sup>             | 20.7% | 21.1% | 16.4% | 18.3% | 14.6% | 16.4% |
| “Ideal” cardiovascular health <sup>h</sup>    | 8.2%  | 6.8%  | 12.6% | 8.0%  | 14.6% | 8.2%  |

<sup>a</sup> Note all estimates are weighted for the survey’s complex sampling design. All estimates are age-standardized to the U.S. 2010 population, except for age. Percentage may not sum to 100 due to missing values or rounding. SE= standard error. <sup>b</sup> Insomnia symptoms defined as either trouble falling asleep and/or difficulty maintaining sleep 3+ times a week. **Meets PA guidelines** defined as ≥150 minutes/week of moderate intensity or ≥75 minutes/week of vigorous intensity or ≥150 minutes/week of moderate and vigorous intensity. <sup>d</sup> Kessler 6-psychological distress scale score ≥13. <sup>e</sup> Dyslipidemia defined as high cholesterol in the 12 months prior to interview. Available for survey years 2011–2017. <sup>f</sup> Hypertension defined as ever told by a doctor had hypertension. <sup>g</sup> Prediabetes/diabetes defined as ever told by a doctor had diabetes or prediabetic condition. <sup>h</sup> “Ideal” cardiovascular health includes never smoking/quit >12 months prior to interview, BMI 18.5 - <25 kg/m<sup>2</sup>, meeting physical activity guidelines, and no prior diagnosis of dyslipidemia, hypertension, or diabetes/prediabetes.

**Supplemental Table 3.** Age-standardized Sociodemographic, Health Behavior, and Clinical Characteristics between Low, Medium, and High Neighborhood Social Cohesion Among Racial/Ethnic Groups, National Health Interview Survey, 2013–2018 (N=167,153) <sup>a</sup>

| Sociodemographic                         | Neighborhood Social Cohesion |                         |                      |                  |                          |                         |                     |                  |                          |                         |                     |                  |
|------------------------------------------|------------------------------|-------------------------|----------------------|------------------|--------------------------|-------------------------|---------------------|------------------|--------------------------|-------------------------|---------------------|------------------|
|                                          | Low<br>n=53,364 (32%)        |                         |                      |                  | Medium<br>n=55,163 (33%) |                         |                     |                  | High<br>n=58,626 (35%)   |                         |                     |                  |
|                                          | NH-<br>White<br>n=31,233     | NH-<br>Black<br>n=8,507 | Hispanic<br>n=10,742 | Asian<br>n=2,882 | NH-<br>White<br>n=36,726 | NH-<br>Black<br>n=7,073 | Hispanic<br>n=7,937 | Asian<br>n=3,427 | NH-<br>White<br>n=45,173 | NH-<br>Black<br>n=4,987 | Hispanic<br>n=5,765 | Asian<br>n=2,701 |
| Age, mean (S.E.)                         | 46.3<br>(0.17)               | 41.8<br>(0.27)          | 39.5<br>(0.23)       | 42.9<br>(0.41)   | 49.1<br>(0.16)           | 45.5<br>(0.29)          | 41.1<br>(0.28)      | 44.7<br>(0.38)   | 52.0<br>(0.15)           | 48.4<br>(0.39)          | 44.8<br>(0.36)      | 47.3<br>(0.48)   |
| 18–30 years                              | 18.8%                        | 19.0%                   | 18.4%                | 17.3%            | 16.0%                    | 16.2%                   | 17.5%               | 13.8%            | 13.4%                    | 16.5%                   | 14.2%               | 11.7%            |
| 31–50 years                              | 20.8%                        | 20.7%                   | 21.3%                | 22.3%            | 23.6%                    | 23.4%                   | 22.2%               | 25.9%            | 26.2%                    | 23.1%                   | 25.5%               | 28.0%            |
| ≥50 years                                | 60.3%                        | 60.3%                   | 60.3%                | 60.3%            | 60.3%                    | 60.3%                   | 60.3%               | 60.3%            | 60.3%                    | 60.3%                   | 60.3%               | 60.3%            |
| Sex/gender                               |                              |                         |                      |                  |                          |                         |                     |                  |                          |                         |                     |                  |
| Women                                    | 52.1%                        | 57.5%                   | 53.3%                | 56.1%            | 49.2%                    | 53.1%                   | 47.2%               | 50.7%            | 52.9%                    | 53.1%                   | 52.6%               | 55.7%            |
| Educational attainment                   |                              |                         |                      |                  |                          |                         |                     |                  |                          |                         |                     |                  |
| <High school                             | 8.0%                         | 14.2%                   | 34.8%                | 11.4%            | 5.5%                     | 11.3%                   | 30.5%               | 8.5%             | 5.3%                     | 12.8%                   | 29.9%               | 7.5%             |
| High school graduate                     | 28.8%                        | 36.2%                   | 28.5%                | 21.1%            | 25.4%                    | 32.0%                   | 28.3%               | 18.4%            | 25.4%                    | 32.0%                   | 27.9%               | 18.2%            |
| Some college                             | 33.4%                        | 33.3%                   | 23.9%                | 20.4%            | 31.0%                    | 32.2%                   | 25.2%               | 18.6%            | 30.8%                    | 30.0%                   | 24.9%               | 20.1%            |
| ≥College                                 | 29.8%                        | 16.3%                   | 12.8%                | 47.2%            | 38.1%                    | 24.4%                   | 16.0%               | 54.5%            | 38.4%                    | 25.2%                   | 17.4%               | 54.1%            |
| Annual household income                  |                              |                         |                      |                  |                          |                         |                     |                  |                          |                         |                     |                  |
| <\$35,000                                | 32.0%                        | 51.9%                   | 46.7%                | 31.3%            | 22.0%                    | 41.6%                   | 38.1%               | 21.7%            | 19.3%                    | 40.9%                   | 37.8%               | 21.0%            |
| \$35–\$74,999                            | 32.5%                        | 29.9%                   | 32.8%                | 27.0%            | 29.5%                    | 30.5%                   | 32.9%               | 25.3%            | 27.5%                    | 29.9%                   | 30.4%               | 22.4%            |
| ≥\$75,000                                | 35.6%                        | 18.2%                   | 20.5%                | 41.6%            | 48.5%                    | 27.9%                   | 29.0%               | 53.0%            | 53.2%                    | 29.2%                   | 31.8%               | 56.6%            |
| Unemployed/not in labor force            | 42.3%                        | 49.0%                   | 43.8%                | 41.5%            | 38.0%                    | 44.9%                   | 43.1%               | 39.3%            | 38.4%                    | 46.4%                   | 43.4%               | 38.8%            |
| Occupational class                       |                              |                         |                      |                  |                          |                         |                     |                  |                          |                         |                     |                  |
| Professional/management                  | 20.6%                        | 11.6%                   | 9.0%                 | 26.5%            | 25.2%                    | 15.2%                   | 12.1%               | 32.6%            | 25.0%                    | 14.2%                   | 13.3%               | 33.2%            |
| Support services                         | 46.3%                        | 44.1%                   | 34.6%                | 47.3%            | 46.2%                    | 44.6%                   | 33.9%               | 43.0%            | 48.1%                    | 44.2%                   | 36.3%               | 43.6%            |
| Laborers                                 | 33.2%                        | 44.4%                   | 56.3%                | 26.2%            | 28.6%                    | 40.2%                   | 54.0%               | 24.5%            | 26.9%                    | 41.6%                   | 50.4%               | 23.2%            |
| Marital/co-habiting status               |                              |                         |                      |                  |                          |                         |                     |                  |                          |                         |                     |                  |
| Married/living with partner or cohabited | 58.2%                        | 37.2%                   | 57.1%                | 62.7%            | 65.2%                    | 43.0%                   | 61.0%               | 69.8%            | 69.0%                    | 44.2%                   | 63.4%               | 74.1%            |
| Divorced/widowed                         | 23.2%                        | 29.7%                   | 23.9%                | 18.9%            | 18.7%                    | 28.2%                   | 20.9%               | 15.2%            | 17.5%                    | 27.7%                   | 20.7%               | 14.1%            |
| Single/no live-in partner                | 18.5%                        | 33.1%                   | 19.0%                | 18.5%            | 16.1%                    | 28.8%                   | 18.1%               | 15.0%            | 13.5%                    | 28.1%                   | 15.9%               | 11.9%            |
| Region of residence                      |                              |                         |                      |                  |                          |                         |                     |                  |                          |                         |                     |                  |
| Northeast                                | 18.8%                        | 17.4%                   | 15.2%                | 18.0%            | 20.0%                    | 15.8%                   | 14.2%               | 23.4%            | 19.2%                    | 13.2%                   | 12.3%               | 17.8%            |
| Midwest                                  | 26.8%                        | 18.9%                   | 7.4%                 | 11.8%            | 27.4%                    | 17.2%                   | 8.7%                | 10.1%            | 27.6%                    | 12.2%                   | 8.8%                | 12.0%            |

|                                             |            |          |          |       |               |          |          |       |             |          |          |       |
|---------------------------------------------|------------|----------|----------|-------|---------------|----------|----------|-------|-------------|----------|----------|-------|
| South                                       | 32.8%      | 55.3%    | 37.9%    | 20.9% | 32.7%         | 59.0%    | 36.7%    | 21.1% | 35.2%       | 68.0%    | 39.5%    | 28.3% |
| West                                        | 21.6%      | 8.4%     | 39.6%    | 49.2% | 19.9%         | 8.0%     | 40.4%    | 45.3% | 18.0%       | 6.7%     | 39.4%    | 42.0% |
| <b>Health Behaviors</b>                     | <b>Low</b> |          |          |       | <b>Medium</b> |          |          |       | <b>High</b> |          |          |       |
|                                             | NH-White   | NH-Black | Hispanic | Asian | NH-White      | NH-Black | Hispanic | Asian | NH-White    | NH-Black | Hispanic | Asian |
| Sleep duration                              |            |          |          |       |               |          |          |       |             |          |          |       |
| <6 hours (very short)                       | 11.2%      | 15.4%    | 11.6%    | 11.8% | 7.4%          | 11.6%    | 7.9%     | 7.9%  | 6.9%        | 13.1%    | 8.1%     | 7.7%  |
| 6–7 hours (short)                           | 24.0%      | 26.2%    | 24.1%    | 26.0% | 22.2%         | 26.4%    | 21.2%    | 24.1% | 20.0%       | 23.9%    | 19.8%    | 23.6% |
| 7–9 hours (recommended)                     | 60.4%      | 52.4%    | 60.2%    | 58.7% | 66.9%         | 56.7%    | 67.9%    | 65.3% | 69.4%       | 56.7%    | 67.6%    | 66.4% |
| >9 hours (long)                             | 4.3%       | 6.0%     | 4.1%     | 3.6%  | 3.5%          | 5.4%     | 3.0%     | 2.7%  | 3.6%        | 6.3%     | 4.6%     | 2.4%  |
| Trouble falling asleep<br>(≥3 times/week)   | 26.9%      | 23.7%    | 25.0%    | 16.5% | 19.7%         | 18.8%    | 16.8%    | 12.1% | 17.2%       | 16.2%    | 16.7%    | 10.6% |
| Trouble staying asleep<br>(≥3 times/week)   | 36.1%      | 28.3%    | 25.7%    | 19.8% | 29.4%         | 23.1%    | 18.9%    | 14.5% | 26.1%       | 21.9%    | 18.9%    | 12.8% |
| Insomnia symptoms <sup>b</sup>              | 43.2%      | 34.3%    | 32.9%    | 25.6% | 35.0%         | 27.8%    | 24.2%    | 18.6% | 31.3%       | 25.8%    | 23.2%    | 17.0% |
| Woke up feeling unrested<br>(≥3 days/week)  | 53.1%      | 46.2%    | 48.0%    | 44.4% | 43.8%         | 40.3%    | 39.3%    | 36.7% | 37.9%       | 35.8%    | 35.1%    | 30.6% |
| Sleep medication (≥3<br>times/week)         | 13.4%      | 8.5%     | 9.5%     | 4.6%  | 10.4%         | 6.5%     | 6.4%     | 3.6%  | 10.1%       | 6.5%     | 6.4%     | 3.1%  |
| Smoking status                              |            |          |          |       |               |          |          |       |             |          |          |       |
| Never/quit >12 months<br>prior <sup>c</sup> | 77.0%      | 80.3%    | 87.2%    | 89.0% | 82.9%         | 83.8%    | 89.6%    | 91.7% | 84.8%       | 84.3%    | 89.2%    | 92.5% |
| Quit ≤12 months                             | 1.8%       | 1.1%     | 0.9%     | 1.2%  | 1.5%          | 1.1%     | 1.0%     | 0.5%  | 1.3%        | 1.0%     | 0.9%     | 0.4%  |
| Current                                     | 21.2%      | 18.5%    | 11.9%    | 9.8%  | 15.5%         | 15.1%    | 9.3%     | 7.8%  | 13.9%       | 14.7%    | 9.9%     | 7.1%  |
| Alcohol status                              |            |          |          |       |               |          |          |       |             |          |          |       |
| Never                                       | 14.0%      | 29.0%    | 29.2%    | 40.9% | 13.1%         | 27.9%    | 28.8%    | 38.9% | 15.1%       | 31.2%    | 31.0%    | 43.1% |
| Former                                      | 18.1%      | 18.1%    | 17.6%    | 10.7% | 14.3%         | 17.4%    | 15.7%    | 9.8%  | 13.8%       | 18.0%    | 14.2%    | 9.5%  |
| Current                                     | 67.9%      | 52.9%    | 53.2%    | 48.4% | 72.6%         | 54.8%    | 55.5%    | 51.3% | 71.0%       | 50.8%    | 54.8%    | 47.4% |
| Leisure-time physical<br>activity           |            |          |          |       |               |          |          |       |             |          |          |       |
| Never/unable                                | 34.5%      | 45.1%    | 44.1%    | 33.0% | 27.5%         | 38.3%    | 39.0%    | 27.3% | 25.8%       | 41.0%    | 39.3%    | 26.2% |
| Does not meet PA<br>guidelines              | 20.0%      | 18.1%    | 18.2%    | 22.0% | 19.3%         | 18.6%    | 17.0%    | 22.1% | 18.4%       | 17.1%    | 15.8%    | 21.7% |
| Meets PA guidelines <sup>c</sup>            | 45.5%      | 36.8%    | 37.7%    | 45.0% | 53.2%         | 43.1%    | 44.0%    | 50.6% | 55.8%       | 42.0%    | 44.8%    | 52.1% |
| <b>Clinical Characteristics</b>             | <b>Low</b> |          |          |       | <b>Medium</b> |          |          |       | <b>High</b> |          |          |       |
|                                             | NH-White   | NH-Black | Hispanic | Asian | NH-White      | NH-Black | Hispanic | Asian | NH-White    | NH-Black | Hispanic | Asian |



|                                               |       |       |       |       |       |       |       |       |       |       |       |       |
|-----------------------------------------------|-------|-------|-------|-------|-------|-------|-------|-------|-------|-------|-------|-------|
| Health status                                 |       |       |       |       |       |       |       |       |       |       |       |       |
| Excellent/very good                           | 52.5% | 42.9% | 43.3% | 52.1% | 63.0% | 48.3% | 50.9% | 59.7% | 68.0% | 52.5% | 54.2% | 64.5% |
| Good                                          | 29.3% | 32.1% | 32.8% | 31.3% | 25.8% | 32.0% | 31.3% | 29.7% | 22.6% | 29.0% | 28.8% | 25.7% |
| Fair/poor                                     | 18.2% | 25.0% | 23.9% | 16.6% | 11.2% | 19.6% | 17.8% | 10.5% | 9.4%  | 18.5% | 17.0% | 9.8%  |
| Mental illness <sup>d</sup>                   | 6.2%  | 4.5%  | 6.5%  | 2.4%  | 2.7%  | 2.7%  | 2.6%  | 2.0%  | 2.1%  | 3.1%  | 3.1%  | 1.2%  |
| Body Mass Index (BMI)                         |       |       |       |       |       |       |       |       |       |       |       |       |
| Recommended BMI (18.5-<25 kg/m <sup>2</sup> ) | 32.1% | 25.8% | 24.8% | 55.2% | 33.8% | 25.7% | 25.8% | 56.4% | 35.5% | 24.9% | 28.2% | 56.9% |
| Overweight (25–29.9 kg/m <sup>2</sup> )       | 33.5% | 32.7% | 40.3% | 32.1% | 36.3% | 34.6% | 41.2% | 32.9% | 36.7% | 33.8% | 39.0% | 32.5% |
| Obese (≥30 kg/m <sup>2</sup> )                | 34.5% | 41.5% | 34.9% | 12.7% | 29.8% | 39.7% | 33.0% | 10.7% | 27.8% | 41.3% | 32.8% | 10.6% |
| Dyslipidemia <sup>e</sup>                     | 51.6% | 49.9% | 49.4% | 53.4% | 47.8% | 47.2% | 50.6% | 56.3% | 50.0% | 49.2% | 50.8% | 53.7% |
| Hypertension <sup>f</sup>                     | 37.6% | 48.6% | 36.9% | 34.1% | 37.6% | 46.8% | 32.8% | 31.9% | 32.9% | 46.8% | 33.3% | 31.3% |
| Prediabetes/diabetes <sup>g</sup>             | 19.0% | 24.5% | 26.4% | 21.0% | 15.2% | 23.3% | 24.1% | 19.7% | 14.0% | 21.9% | 21.0% | 19.0% |
| “Ideal” cardiovascular health <sup>h</sup>    | 8.6%  | 4.3%  | 5.4%  | 12.8% | 11.2% | 6.3%  | 7.5%  | 14.1% | 12.6% | 5.2%  | 7.3%  | 14.9% |

<sup>a</sup> Note all estimates are weighted for the survey’s complex sampling design. All estimates are age-standardized to the U.S. 2010 population, except for age. Percentage may not sum to 100 due to missing values or rounding. <sup>b</sup> Insomnia symptoms defined as either trouble falling asleep and/or difficulty maintaining sleep 3+ times a week. <sup>c</sup> Meets PA guidelines defined as ≥150 minutes/week of moderate intensity or ≥75 minutes/week of vigorous intensity or ≥150 minutes/week of moderate and vigorous intensity. <sup>d</sup> Kessler 6-psychological distress scale score ≥13. <sup>e</sup> Dyslipidemia defined as high cholesterol in the 12 months prior to interview. Available for survey years 2011–2017. <sup>f</sup> Hypertension defined as ever told by a doctor had hypertension. <sup>g</sup> Prediabetes/diabetes defined as ever told by a doctor had diabetes or prediabetic condition. <sup>h</sup> “Ideal” cardiovascular health includes never smoking/quit >12 months prior to interview, BMI 18.5 - <25 kg/m<sup>2</sup>, meeting physical activity guidelines, and no prior diagnosis of dyslipidemia, hypertension, or diabetes/prediabetes.

**Supplemental Table 4.** Age-standardized Sociodemographic between Neighborhood Social Cohesion Scale. National Health Interview Survey, 2013–2018 (N=167,153) <sup>a</sup>

|             | Neighborhood Social Cohesion                    |                                                      |                                            |                                   |
|-------------|-------------------------------------------------|------------------------------------------------------|--------------------------------------------|-----------------------------------|
|             | People in this neighborhood help each other out | There are people I can count on in this neighborhood | People in this neighborhood can be trusted | This is a close-knit neighborhood |
| All         | 68,704 (41.1%)                                  | 84,914 (50.8%)                                       | 78,656 (47.1%)                             | 49,516 (29.6%)                    |
| Age         |                                                 |                                                      |                                            |                                   |
| 18–30 years | 30.9%                                           | 39.6%                                                | 36.0%                                      | 22.8%                             |
| 31–50 years | 39.0%                                           | 47.9%                                                | 44.1%                                      | 28.3%                             |
| ≥50 years   | 45.6%                                           | 56.5%                                                | 53.8%                                      | 32.4%                             |
| Sex/gender  |                                                 |                                                      |                                            |                                   |
| Women       | 42.4%                                           | 52.5%                                                | 48.8%                                      | 30.4%                             |

|                 |       |       |       |       |
|-----------------|-------|-------|-------|-------|
| Race/ethnicity  |       |       |       |       |
| NH-White        | 45.6% | 57.2% | 54.6% | 31.6% |
| NH-Black        | 32.2% | 38.5% | 30.8% | 26.5% |
| Hispanic/Latinx | 31.1% | 38.9% | 35.1% | 25.0% |
| Asian           | 38.7% | 43.2% | 43.2% | 28.5% |

<sup>a</sup> Note all estimates are weighted for the survey's complex sampling design. All estimates are age-standardized to the U.S. 2010 population, except for age.

**Supplemental Figure 1:** Flow Chart of Participant Selection.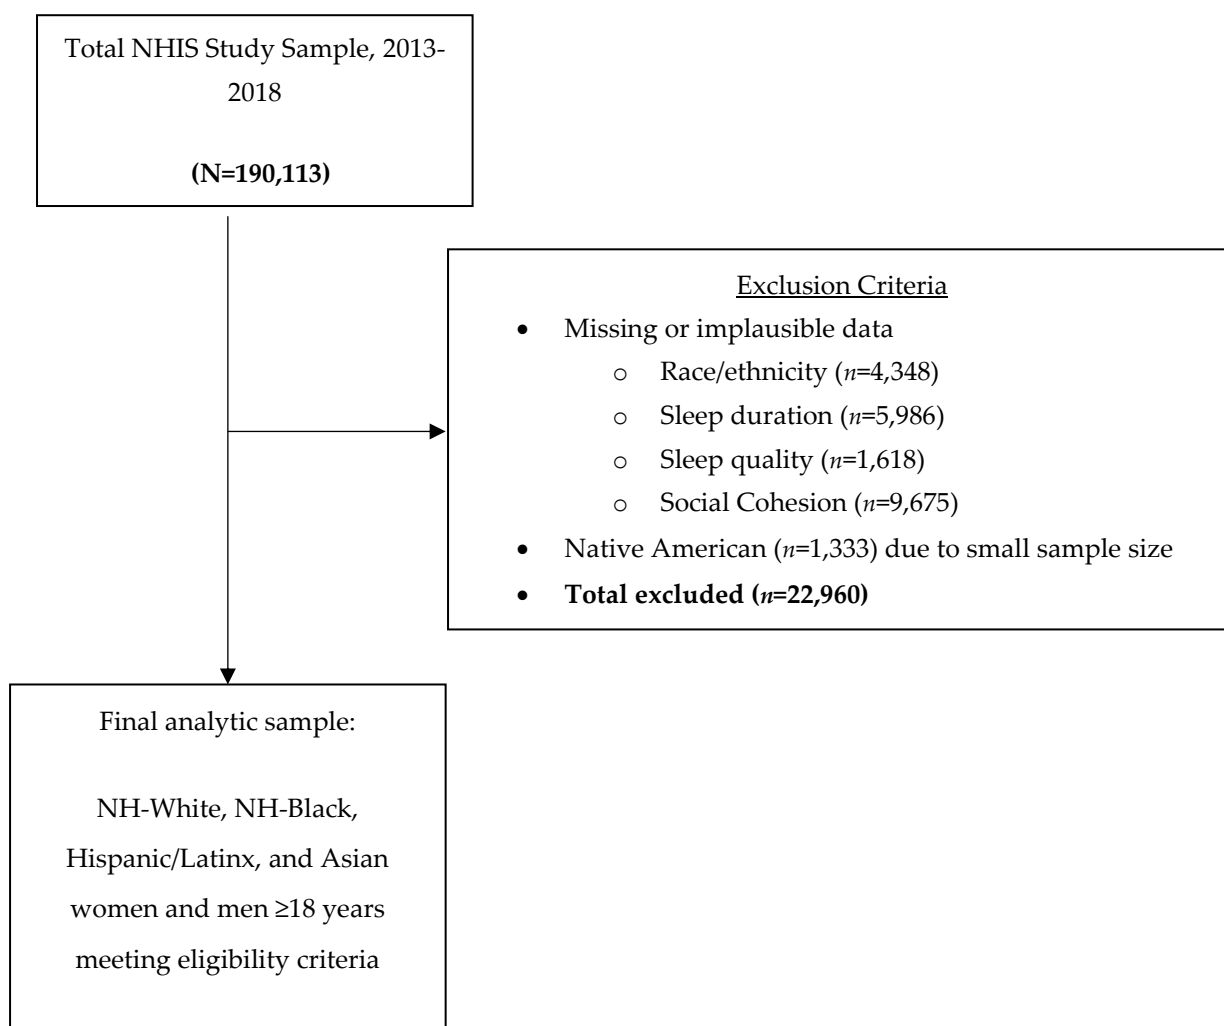

Supplement: s1 [file s1]
